# Supplementary material for: Similarity of the dog and human gut microbiomes in gene content and response to diet
Source: PubMed Central journal article supplement (PMC5907387; doi:10.1186/s40168-018-0450-3), 2018-04-19

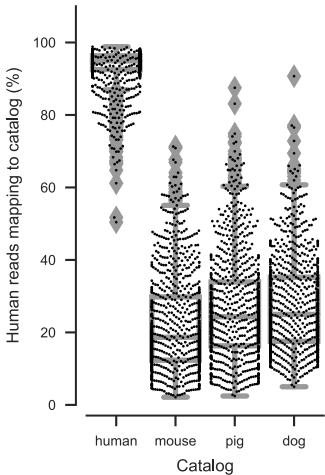

Supplement: 40168_2018_450_MOESM9_ESM.pdf [file 40168_2018_450_MOESM9_ESM.pdf]
