# Supplementary material for: Similarity of the dog and human gut microbiomes in gene content and response to diet
Source: PubMed Central journal article supplement (PMC5907387; doi:10.1186/s40168-018-0450-3), 2018-04-19

*Prevotella copri* DSM 18205

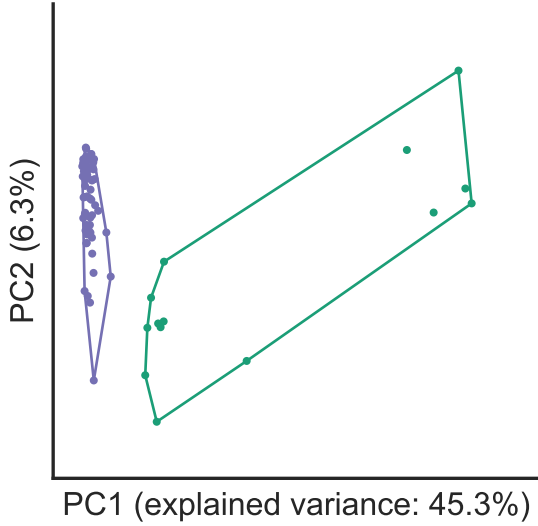

*Ruminococcus gnavus* ATCC 29149

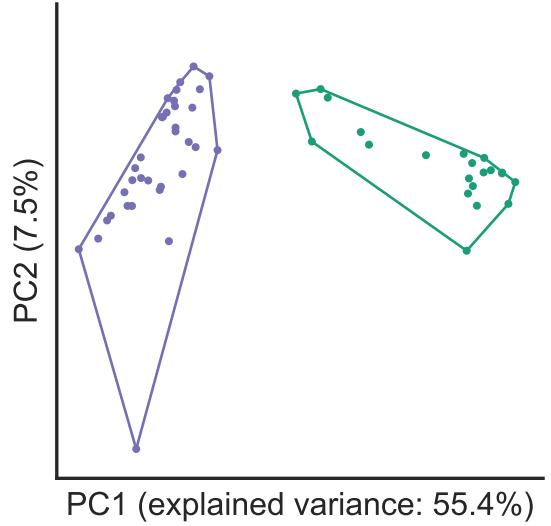

*Parabacteroides merdae* ATCC 43184

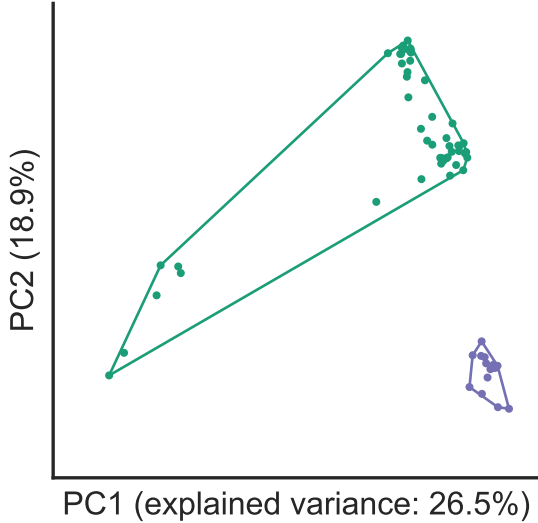

*Bacteroides* sp. D20

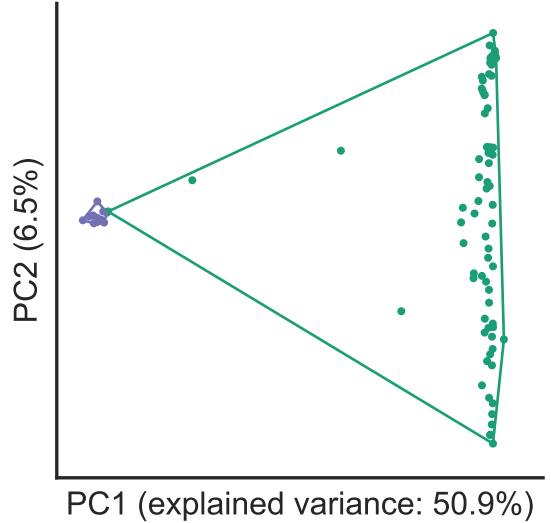

*Bacteroides vulgatus* ATCC 8482

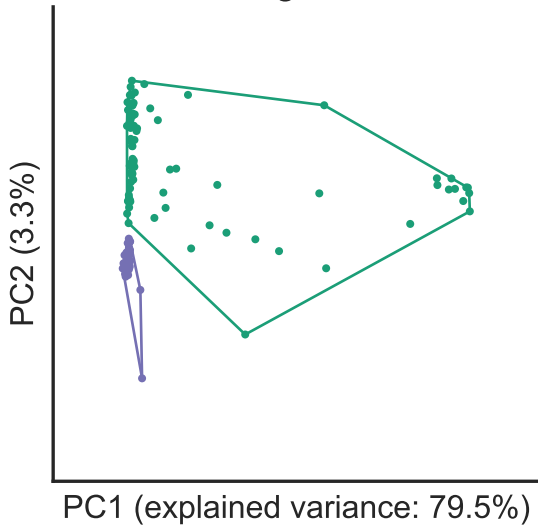

Burkholderiales bacterium 1\_1\_47

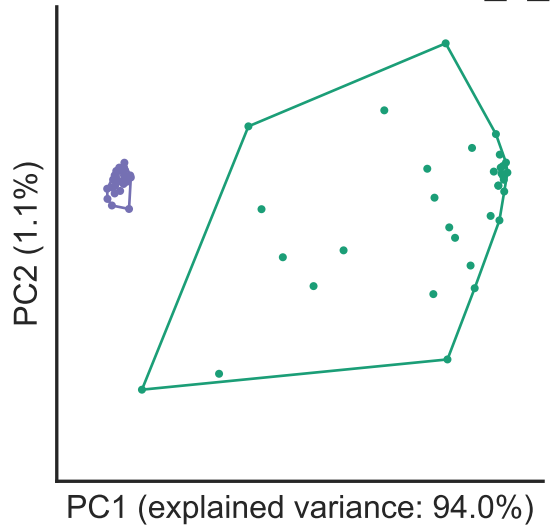

Supplement: 40168_2018_450_MOESM11_ESM.pdf [file 40168_2018_450_MOESM11_ESM.pdf]
